# Supplementary material
Source: publisher figshare collection journal article supplement (https://plos.figshare.com/articles/dataset/_/1364841)
Supplement: Supplementary file [file 1]

**Table S3. Variation in *HMMR* and haplotype association study for risk of breast cancer in *BRCA1* mutation carriers (*n* = 14,797)\*.**

| Haplotype | Frequency | rs2069368 | rs177250 | rs299302 | rs6877450 | rs2303076 | rs3756648 | rs299284 | rs2303078 | rs299290 | rs299295 | rs299318 | rs299319 | rs10038157 | rs7734424 | HR   | 95% CI    | <i>p</i> |
|-----------|-----------|-----------|----------|----------|-----------|-----------|-----------|----------|-----------|----------|----------|----------|----------|------------|-----------|------|-----------|----------|
| A         | 0.46      | G         | A        | G        | A         | G         | A         | G        | G         | A        | G        | G        | A        | A          | G         | 0.99 | 0.96-1.02 | 0.47     |
| B         | 0.22      | G         | A        | G        | A         | A         | G         | G        | G         | A        | G        | G        | A        | A          | G         | 0.96 | 0.93-0.99 | 0.045    |
| C         | 0.11      | G         | G        | A        | A         | G         | G         | A        | G         | G        | A        | G        | G        | A          | A         | 1.08 | 1.02-1.13 | 0.004    |
| D         | 0.10      | G         | G        | A        | A         | G         | G         | G        | G         | G        | A        | G        | G        | G          | G         | 1.08 | 1.02-1.14 | 0.005    |

\*The results are those of a standard Cox proportional hazards model
